# Supplementary material for: Modulation and engineering of MOF-derived transition metal selenides/NiFe LDH for application in electrocatalytic hydrogen evolution
Source: Royal Society of Chemistry journal article supplement (doi:10.1039/d4se00180j), 2024-01-01
Supplement: d4se00180j1.pdf [file d4se00180j1.pdf]

**Modulation and engineering of MOF-derived transition metal selenides/NiFe  
LDH for the application in electrocatalytic hydrogen evolution**

Jin Liang<sup>a,b,#,\*</sup>, Hang Luo<sup>a,b,#</sup>, Tian Lei<sup>a,b</sup>, Guang Yang<sup>a,b</sup>

<sup>a</sup>Hunan Province Key Laboratory of Materials Surface & Interface Science and Technology, <sup>b</sup>College of Material Science and Engineering, Central South University of Forestry and Technology, Changsha 410004, P. R. China.

**#These authors contributed equally to this work.**

**\*Corresponding author: [ljcfstu@163.com](mailto:ljcfstu@163.com).**

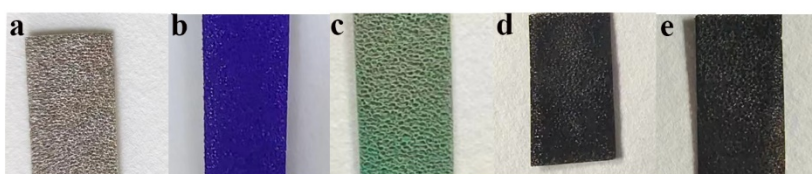

**Fig. S1** The photograph of (a) NF, (b) ZIF-67/NF, (c) NiCo LDH/NF, (d) Ni-Co-Se/NF, (e) Ni-Co-Se@NiFe LDH/NF.

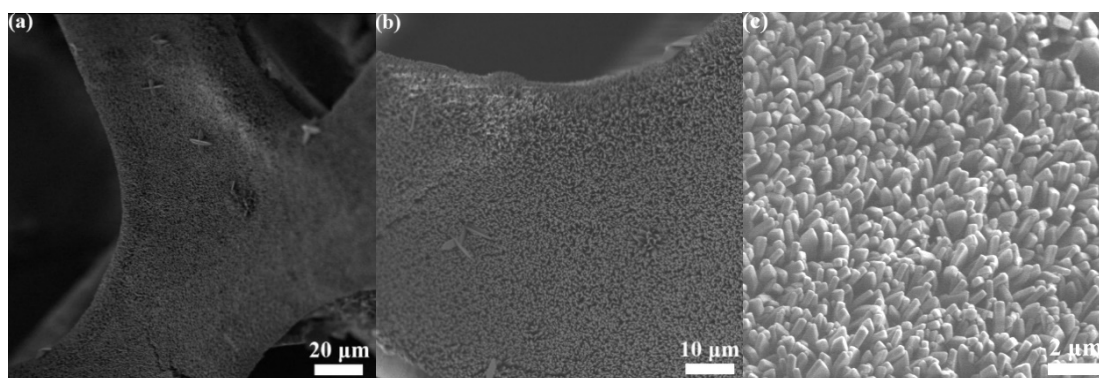

**Fig. S2** SEM images of (a-c) ZIF-67/NF.

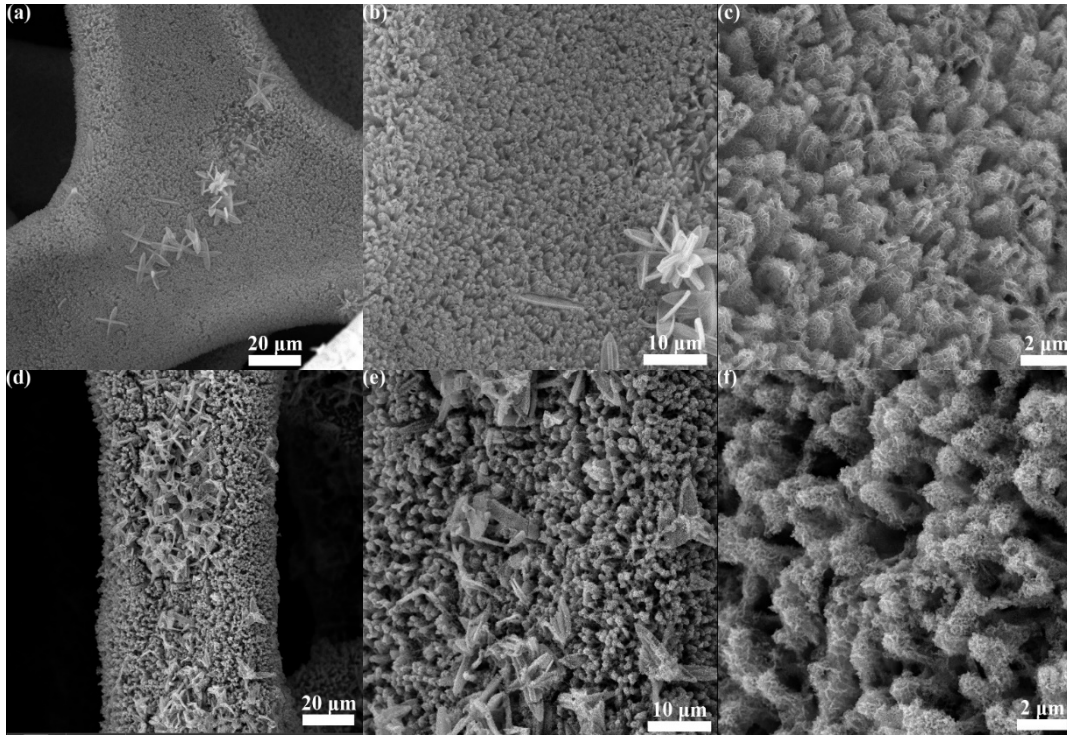

Fig. S3 SEM images of (a-c) NiCo LDH/NF, (d-f) Ni-Co-Se/NF.

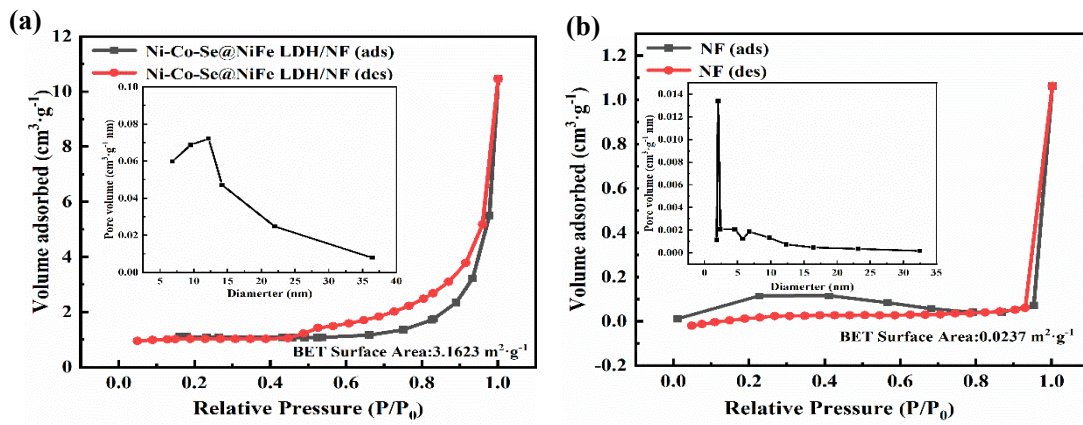

Fig. S4 Nitrogen adsorption-desorption isotherms and corresponding pore size distributions (inside) of (a) Ni-Co-Se@NiFe LDH/NF, (b) NF.

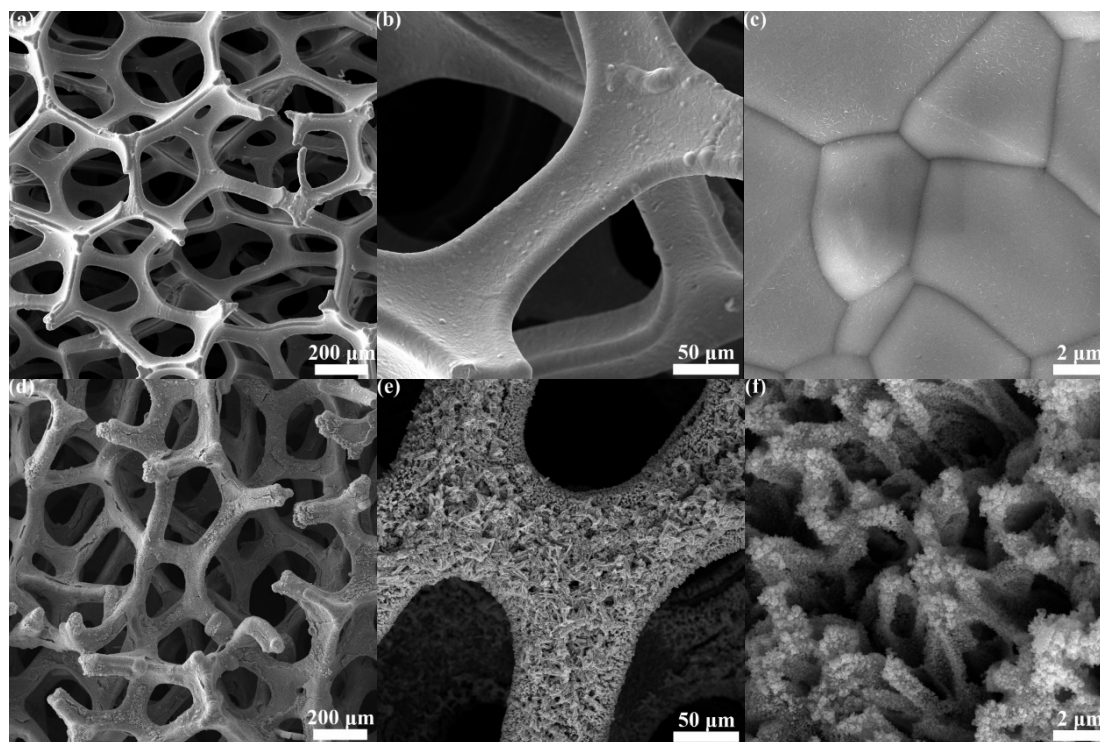

Fig. S5 SEM images of (a-c) NF, (d-f) Ni-Co-Se@NiFe LDH/NF.

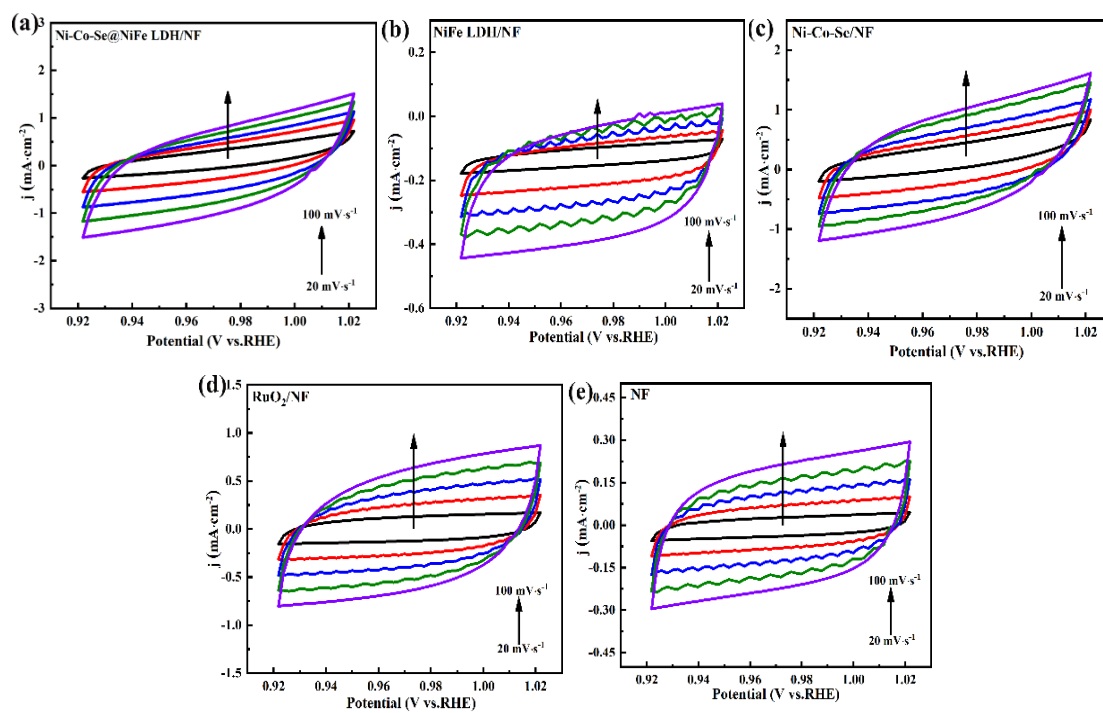

Fig. S6 CV curves of (a-e) Ni-Co-Se@NiFe LDH/NF, NiFe LDH/NF, Ni-Co-Se/NF, RuO<sub>2</sub>/NF and NF at increasing scan rates.



ECSA can be calculated from the  $C_{dl}$  by using the specific capacitance value for a flat standard with  $1 \text{ cm}^2$  of real surface area. For the estimates of surface area, general specific capacitances of  $C_s = 0.040 \text{ mF} \cdot \text{cm}^{-2}$  based on typical reported values were used. ECSA was calculated as following:

$$A_{ECSA}^{catalyst} = \frac{C_{dl}^{catalyst} (\text{mF} \cdot \text{cm}^{-2})}{C_s (\text{mF} \cdot \text{cm}^{-2}) \text{ per } \text{cm}_{ECSA}^2}$$

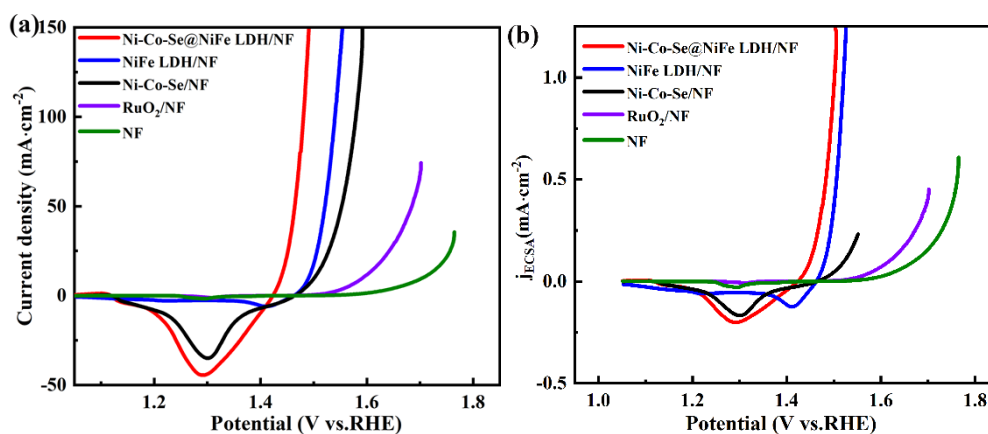

**Fig. S7** OER performance of Ni-Co-Se@NiFe LDH/NF, NiFe LDH/NF, Ni-Co-Se/NF, RuO<sub>2</sub>/NF and NF: (a) LSV curves, (b) ECSA-corrected LSV curves

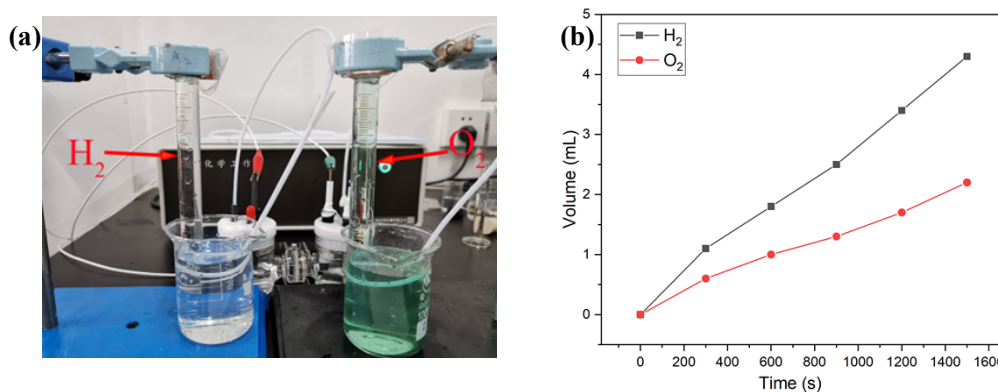

**Fig. S8** (a) Gas collection of H<sub>2</sub> and O<sub>2</sub>. (b) Gas volume versus time.

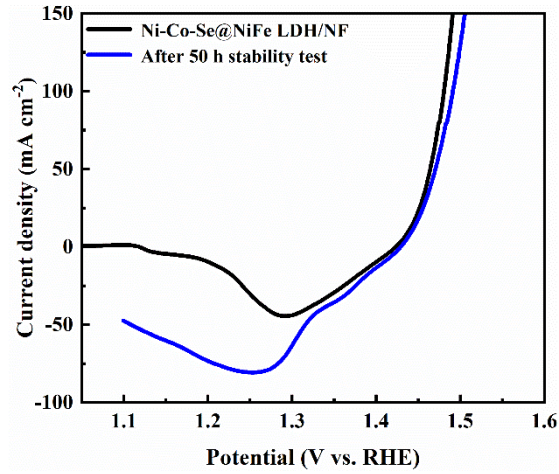

Fig. S9 LSV curves of Ni-Co-Se@NiFe LDH/NF before and after 50 h OER stability test.

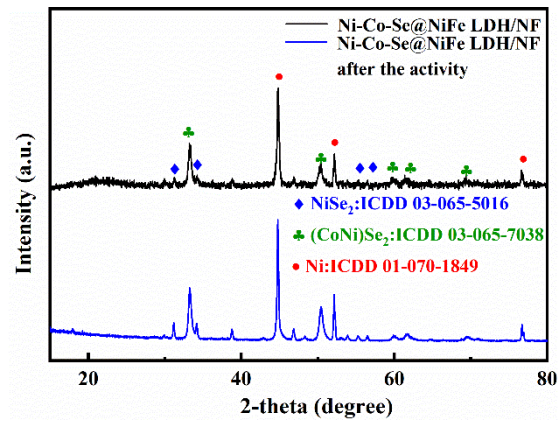

Fig. S10 X-ray diffraction pattern depicting the Ni-Co-Se@NiFe LDH/NF before and after activity test

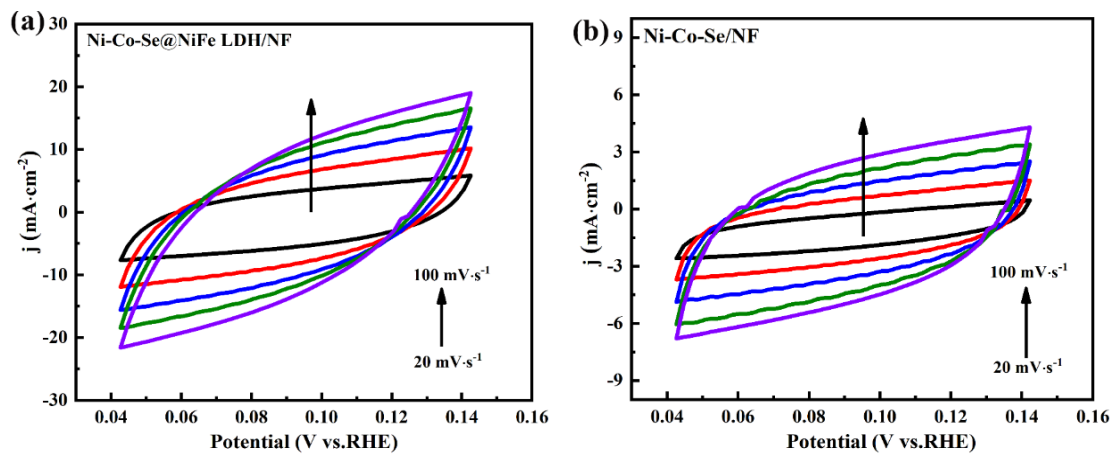

Fig. S11 CV curves of (a) Ni-Co-Se@NiFe LDH/NF, (b) Ni-Co-Se/NF at different scan rates.

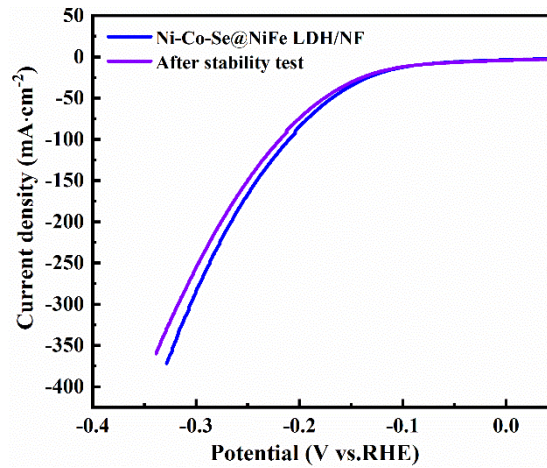

**Fig. S12** LSV curves of Ni-Co-Se@NiFe LDH/NF before and after 50 h HER stability test.

**Table S1** Map Sum Spectrum

| Element | At. % |
|---------|-------|
| Ni      | 50.2  |
| Se      | 34.4  |
| O       | 11.0  |
| Co      | 4.2   |
| Fe      | 0.2   |

**Table S2** Summary of EIS fitting results for OER

| Catalysts            | $R_s$ ( $\Omega$ ) | $R_{ct}$ ( $\Omega$ ) |
|----------------------|--------------------|-----------------------|
| Ni-Co-Se@NiFe LDH/NF | 0.95               | 0.19                  |
| NiFe-LDH/NF          | 1.57               | 0.56                  |
| Ni-Co-Se/NF          | 1.29               | 1.56                  |
| RuO <sub>2</sub> /NF | 1.43               | 8.83                  |
| NF                   | 1.12               | 58.88                 |

**Table S3** Summary of LDH-based non-noble metal electrocatalysts for OER

| Catalysts                                    | Overpotential (mV)         | Electrolyte | Tafel slope<br>(mV·dec <sup>-1</sup> ) | Reference |
|----------------------------------------------|----------------------------|-------------|----------------------------------------|-----------|
| This work                                    | 209@10 mA·cm <sup>-2</sup> | 1.0 M KOH   | 38.6                                   | /         |
|                                              | 234@50 mA·cm <sup>-2</sup> |             |                                        |           |
| Co <sub>3</sub> O <sub>4</sub> @NiFe-LDH/NF  | 215@10 mA·cm <sup>-2</sup> | 1.0 M KOH   | 40.4                                   | 1         |
| s-EPS@FeNi LDH                               | 220@10 mA·cm <sup>-2</sup> | 1.0 M KOH   | 34.34                                  | 2         |
| NiFe LDH@SnO <sub>2</sub> /NF                | 234@10 mA·cm <sup>-2</sup> | 1.0 M KOH   | 37                                     | 3         |
| Cr-FeNi LDH/MXene                            | 232@10 mA·cm <sup>-2</sup> | 1.0 M KOH   | 54.4                                   | 4         |
| NiFe-LDH/Ni <sub>3</sub> S <sub>4</sub>      | 223@10 mA·cm <sup>-2</sup> | 1.0 M KOH   | 49                                     | 5         |
| FeCo <sub>2</sub> O <sub>4</sub> @NiMn LDH   | 232@10 mA·cm <sup>-2</sup> | 1.0 M KOH   | 31.85                                  | 6         |
| NiFe-LDH@γ-MnOOH/NF                          | 226@10 mA·cm <sup>-2</sup> | 1.0 M KOH   | 88                                     | 7         |
| NiCu-LDH@CoS/g-C <sub>3</sub> N <sub>4</sub> | 290@10 mA·cm <sup>-2</sup> | 1.0 M KOH   | 75                                     | 8         |
| SSFF@NiFe LDH                                | 180@10 mA·cm <sup>-2</sup> | 1.0 M KOH   | 31.6                                   | 9         |

**Table S4** Summary of EIS fitting results for HER

| Catalysts            | $R_s$ (Ω) | $R_{ct}$ (Ω) |
|----------------------|-----------|--------------|
| Ni-Co-Se@NiFe LDH/NF | 1.17      | 0.39         |
| NiFe-LDH/NF          | 1.16      | 4.92         |
| Ni-Co-Se/NF          | 1.29      | 1.32         |
| Pt-C/NF              | 1.73      | 0.48         |
| NF                   | 1.49      | 4.63         |

**Table S5** Summary of non-noble metal electrocatalysts for HER

| Catalysts                                              | Overpotential<br>(mV)      | Electrolyte | Tafel slope<br>(mV·dec <sup>-1</sup> ) | Reference |
|--------------------------------------------------------|----------------------------|-------------|----------------------------------------|-----------|
| This work                                              | 78@10 mA·cm <sup>-2</sup>  | 1.0 M KOH   | 88.7                                   | /         |
| NiCoP@NiFe<br>LDH/NF                                   | 119@10 mA·cm <sup>-2</sup> | 1.0 M KOH   | 149.42                                 | 10        |
| NiCoP-Ni <sub>3</sub> S <sub>2</sub> -MoS <sub>2</sub> | 140@10 mA·cm <sup>-2</sup> | 1.0 M KOH   | 91.3                                   | 11        |
| NiFe LDH@CoS <sub>x</sub> /NF                          | 136@10 mA·cm <sup>-2</sup> | 1.0 M KOH   | /                                      | 12        |
| NiCo-LDH@CdS-N                                         | 133@20 mA·cm <sup>-2</sup> | 1.0 M KOH   | 76                                     | 13        |
| Ni <sub>3</sub> Se <sub>2</sub> @NiFe-<br>LDH/NF       | 68@10 mA·cm <sup>-2</sup>  | 1.0 M KOH   | 106.2                                  | 14        |
| Co-Ni-P@Ce <sub>2</sub> O/NF                           | 120@20 mA·cm <sup>-2</sup> | 1.0 M KOH   | 176.7                                  | 15        |
| Zn-Co-Ni-P/NF                                          | 94@10 mA·cm <sup>-2</sup>  | 1.0 M KOH   | 39.4                                   | 16        |
| CoSe/MoSe <sub>2</sub>                                 | 110@10 mA·cm <sup>-2</sup> | 1.0 M KOH   | 54.24                                  | 17        |
| NcSe@MGA                                               | 78@10 mA·cm <sup>-2</sup>  | 1.0 M KOH   | 55                                     | 18        |

**Table S6** Summary of EIS fitting results for overall water splitting

| Catalysts                                       | $R_s$ ( $\Omega$ ) | $R_{ct}$ ( $\Omega$ ) |
|-------------------------------------------------|--------------------|-----------------------|
| Ni-Co-Se@NiFe LDH/NF   Ni-Co-<br>Se@NiFe LDH/NF | 2.113              | 88.83                 |
| RuO <sub>2</sub> /NF  Pt-C/NF                   | 2.599              | 852.8                 |
| NF  NF                                          | 2.482              | 1144                  |

## References

1. L. Meng, H. Xuan, J. wang, X. Liang, Y. Li, J. Yang and P. Han, *J. Alloys Compd.*, 2022, **919**, 165877.
2. G. Li, C. Liu, Y. Yang, X. Pan, T. Wu, F. Zeng, E. Ma, Q. Qu and L. Li, *Chem. Eng. J.*, 2023, **455**, 140893.
3. C. Wan, J. Jin, X. Wei, S. Chen, Y. Zhang, T. Zhu and H. Qu, *Journal of Materials Science & Technology*, 2022, **124**, 102-108.
4. L. Yan, Z. Du, X. Lai, J. Lan, X. Liu, J. Liao, Y. Feng and H. Li, *Int. J. Hydrogen Energy*, 2023, **48**, 1892-1903.
5. Y. Yao, E. Hu, Y. Chen, Y. Cui, Z. Wang and G. Qian, *J. Solid State Chem.*, 2022,



315, 123542.

6. G. Gao, K. Wang and X. Wang, *J. Alloys Compd.*, 2023, **937**, 168478.
7. S.-B. Wang, Y.-S. Xia, Z.-F. Xin and L.-X. Xu, *Catal. Commun.*, 2023, **173**, 106564.
8. K. Kumar Mandari, N. Son and M. Kang, *Appl. Surf. Sci.*, 2022, **593**, 153453.
9. Y. Liu, Z. Song, Z. Li, M. Han, Y. Cheng and Z. Zheng, *Catal. Commun.*, 2022, **164**, 106425.
10. H. Zhang, X. Du, X. Zhang and Y. Wang, *J. Alloys Compd.*, 2023, **937**, 168412.
11. Q. Wang, X. Du and X. Zhang, *Int. J. Hydrogen Energy*, 2023, **48**, 9260-9272.
12. Y. Yang, Y. Xie, Z. Yu, S. Guo, M. Yuan, H. Yao, Z. Liang, Y. R. Lu, T.-S. Chan, C. Li, H. Dong and S. Ma, *Chem. Eng. J.*, 2021, **419**, 129512.
13. A. Pirkarami, S. Rasouli and E. Ghasemi, *J. Energy Chem.*, 2021, **57**, 118-130.
14. J. Hu, S. Zhu, Y. Liang, S. Wu, Z. Li, S. Luo and Z. Cui, *J. Colloid Interface Sci.*, 2021, **587**, 79-89.
15. G. Ma, X. Du and X. Zhang, *J. Alloys Compd.*, 2021, **864**, 158486.
16. Y. Ding, X. Du and X. Zhang, *Appl. Surf. Sci.*, 2021, **543**, 148818.
17. M. Hassan, M. M. Baig, K. H. Shah, A. Hussain, S. A. Hassan and A. Ali, *J. Phys. Chem. Solids*, 2022, **167**, 110780.
18. K. Chaudhary, S. Zulfiqar, H. H. Somaily, M. Aadil, M. F. Warsi and M. Shahid, *Electrochim. Acta*, 2022, **431**, 141103.
